# Supplementary material
Source: ML conference proceedings conference paper supplement (https://openreview.net/forum?id=5ADv5OfQgU)
Supplement: supplementary_material [file attachment]

Table 2: Map statistics for maps currently supported by trajdata. Note that the INTERACTION dataset does not provide pedestrian walkway or crosswalk information [39].

| Dataset           | Lane Length (km) | Road Area (m <sup>2</sup> ) | Pedestrian Area (m <sup>2</sup> ) |
|-------------------|------------------|-----------------------------|-----------------------------------|
| nuScenes [18]     | 212.85           | 946,275                     | 250,164                           |
| INTERACTION [39]  | 18.78            | 76,502                      | –                                 |
| Lyft Level 5 [19] | 185.42           | 591,333                     | 17,359                            |
| nuPlan [27]       | 325.95           | 1,327,965                   | 271,277                           |

Table 3: Proportion of stationary agents per dataset. S/M denotes Single/Multi.

| Dataset       | Proportion | Dataset              | Proportion |
|---------------|------------|----------------------|------------|
| ETH [22]      | 4.0%       | INTERACTION S/M [39] | 5.2%/4.5%  |
| UCY [23]      | 0.0%       | Lyft Level 5 [19]    | 0.1%       |
| SDD [40]      | 5.1%       | Waymo Open [17]      | 53.6%      |
| nuScenes [18] | 17.5%      | nuPlan [27]          | 0.1%       |

## A Additional Dataset Details

**Licenses.** The ETH [22] and UCY [23] datasets are provided for research purposes<sup>4</sup>. SDD [40] is licensed under the Creative Commons Attribution-NonCommercial-ShareAlike 3.0 (CC BY-NC-SA 3.0) License. nuScenes [18] and nuPlan [27] are mostly licensed under a Creative Commons Attribution-NonCommercial-ShareAlike 4.0 International Public License (CC BY-NC-SA 4.0), with modifications outlined in <https://www.nuscenes.org/terms-of-use>. The INTERACTION [39] dataset is provided for non-commercial teaching and research use<sup>5</sup>. The Lyft Level 5 [19] dataset is licensed under the Creative Commons Attribution-NonCommercial-ShareAlike 4.0 license (CC-BY-NC-SA-4.0). The Waymo Open Motion Dataset [17] is licensed under its own Waymo Dataset License Agreement for Non-Commercial Use<sup>6</sup>.

**Protecting Personal Privacy.** All datasets supported by trajdata are captured in public spaces. Further, each of the ETH [22], UCY [23], SDD [40], and INTERACTION [39] datasets capture data in public spaces from elevated fixed traffic cameras or drones, whose birds-eye viewpoints shield the faces of pedestrians and drivers from being collected. The nuScenes [18], Lyft Level 5 [19], Waymo Open Motion [17], and nuPlan [27] datasets each preserve privacy by leveraging state-of-the-art object detection techniques to detect license plates and faces.

## B Map Statistics

As shown in Table 2, current AV dataset maps are very large, spanning multiple neighborhoods in different cities. The INTERACTION [39] dataset is a notable exception in magnitude, however, due to a drone camera’s limited spatial observation range.

## C Stationary Agents

Table 3 summarizes the amount of stationary agents per dataset. As can be seen, nuScenes (17.5%) and Waymo Open (53.6%) are comprised of many parked vehicles.

<sup>4</sup>See the statement at the top of <https://icu.ee.ethz.ch/research/datasets.html> and in the “Crowds Data” card of <https://graphics.cs.ucy.ac.cy/portfolio>.

<sup>5</sup>See <http://interaction-dataset.com/terms-for-non-commercial-use> for full terms.

<sup>6</sup>Full terms can be found at <https://waymo.com/open/terms/>.

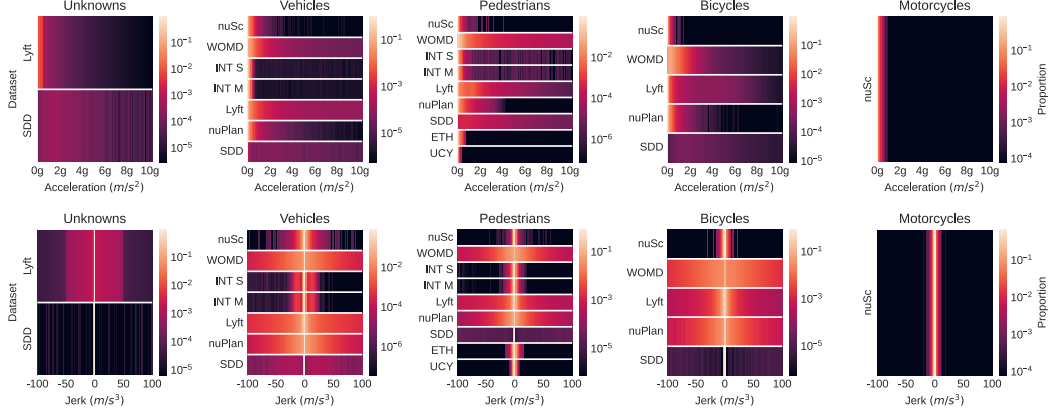

Figure 12: Acceleration (**top**) and jerk (**bottom**) distributions.

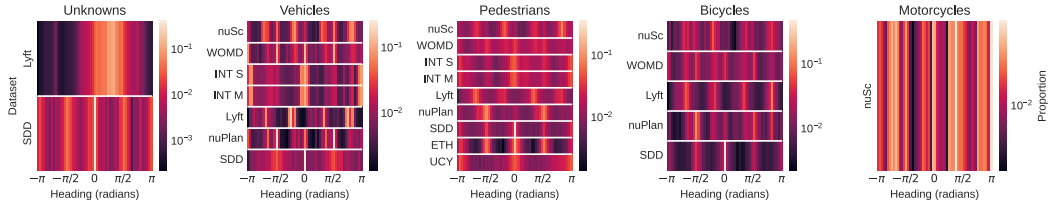

Figure 13: Unnormalized agent heading distributions per dataset and agent type.

## D Acceleration and Jerk

Similar to the speed distributions in the main text, Fig. 12 shows that Waymo [17], Lyft [19], and SDD [40] have long-tailed acceleration and jerk distributions. Further, as seen in the main text, the fixed-camera-based ETH [22] and UCY [23] datasets, as well as the drone-based INTERACTION dataset [39], yield tightly-clustered distributions around smooth motion (generally having small acceleration and jerk magnitudes). Note that these values are derived by trajdata via finite differencing. Accordingly, some overestimation of the acceleration and jerk distribution supports are to be expected.

## E Heading Distributions

The distributions of (unnormalized) agent headings are shown in Fig. 13. As can be seen, most distributions contain peaks around 0 and  $\pm\pi/2$  radians, as north-south and east-west roads are very common in many cities. As a particular example, Fig. 14 visualizes heading distributions for vehicles and pedestrians in the Waymo Open Motion Dataset [17], showing that pedestrians have much more varied heading values than road-following vehicles.

## F Path Efficiency

As can be seen in Fig. 15, most path efficiency distributions are uniformly distributed, with peaks near 100% (shown as brightly-colored regions), echoing earlier straight-line findings. Further, the INTERACTION [39] dataset is an outlier in that its vehicle and pedestrian trajectories are virtually all straight lines with much less curved motion than other AV and pedestrian datasets.

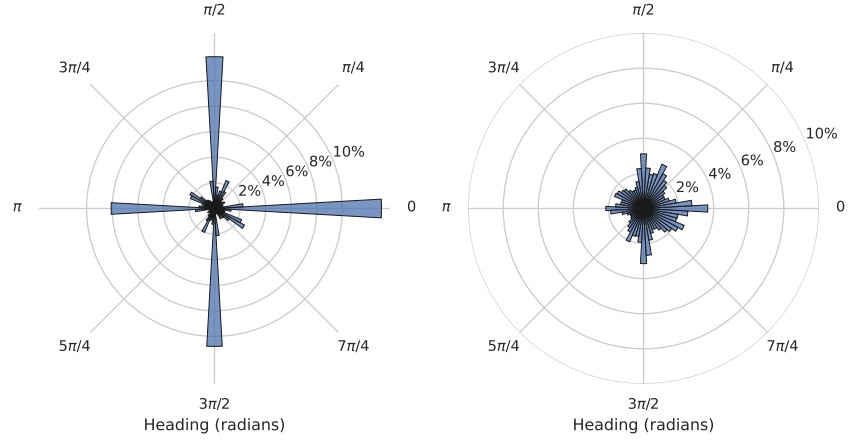

Figure 14: Vehicle (**left**) and pedestrian (**right**) heading distributions in Waymo Open [17].

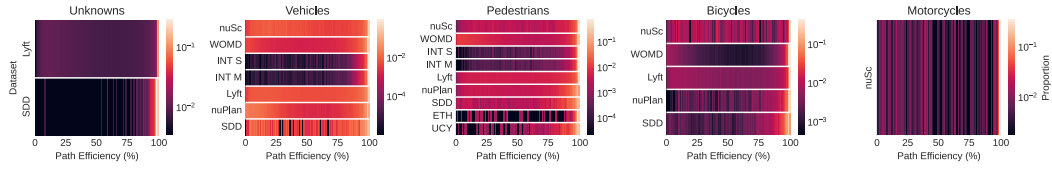

Figure 15: Path efficiency distributions visualized per agent type and dataset.
